# Supplementary material
Source: PubMed Central journal article supplement (PMC8417856)
Supplement: ONCO-26-740-s002.pdf [file ONCO-26-740-s002.pdf]

Supplemental Table for:  
 PROGNOSTIC ROLE OF CIRCULATING TUMOR CELLS (CTCs) IN METASTATIC RENAL CELL CARCINOMA: A LARGE, MULTICENTER PROSPECTIVE TRIAL.  
 Umberto Basso et al.

**Supplementary Table 1.**

Cox Multivariate analysis for IMDC group and CTC baseline value  $\geq 3$  vs 0-2.

|                                       | Progression-free survival |                        | Overall survival |                        |
|---------------------------------------|---------------------------|------------------------|------------------|------------------------|
|                                       | HR                        | CI (p)                 | HR               | CI (p)                 |
| <b>MDC intermediate vs good</b>       | 2.19                      | 1.39-3.48<br>(0.001)   | 5.21             | 2.45-11.08<br>(<0.001) |
| <b>IMDC poor vs good</b>              | 7.14                      | 3.94-12.94<br>(<0.001) | 21.32            | 9.11-49.90<br>(<0.001) |
| <b>CTC <math>\geq 3</math> vs 0-2</b> | 1.91                      | 1.16-3.14<br>(0.011)   | 1.67             | 0.95-2.93<br>(0.076)   |

CI=95% Confidence interval.
